# Supplementary material for: Pharmaceutical cocrystals of nomegestrol acetate with superior dissolution
Source: Royal Society of Chemistry journal article supplement (doi:10.1039/d2ce00870j), 2022-01-01
Supplement: d2ce00870j1.pdf [file d2ce00870j1.pdf]

*Electronic Supplementary Information (ESI)*

**Pharmaceutical cocrystals of nomegestrol acetate with superior  
dissolution**

Xiaofeng Chen and Lifeng Ning\*

National Research Institute for Family Planning, 100081, PR China

\* Corresponding author.

Email address: [ninglifeng2022@163.com](mailto:ninglifeng2022@163.com)

**Scheme S1.** Library of cofomers.

|                                                                                     |                                                                                     |                                                                                       |
|-------------------------------------------------------------------------------------|-------------------------------------------------------------------------------------|---------------------------------------------------------------------------------------|
| 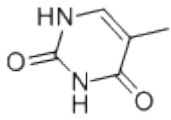   |    |    |
| x                                                                                   | x                                                                                   | x                                                                                     |
|    |    |    |
| x                                                                                   | √                                                                                   | x                                                                                     |
|    |    |    |
| x                                                                                   | x                                                                                   | x                                                                                     |
|   |    |    |
| x                                                                                   | x                                                                                   | √                                                                                     |
|  |  |  |
| x                                                                                   | x                                                                                   | x                                                                                     |
|  |  |  |
| x                                                                                   | x                                                                                   | x                                                                                     |

\*Formation of co-crystal is denoted by “√”

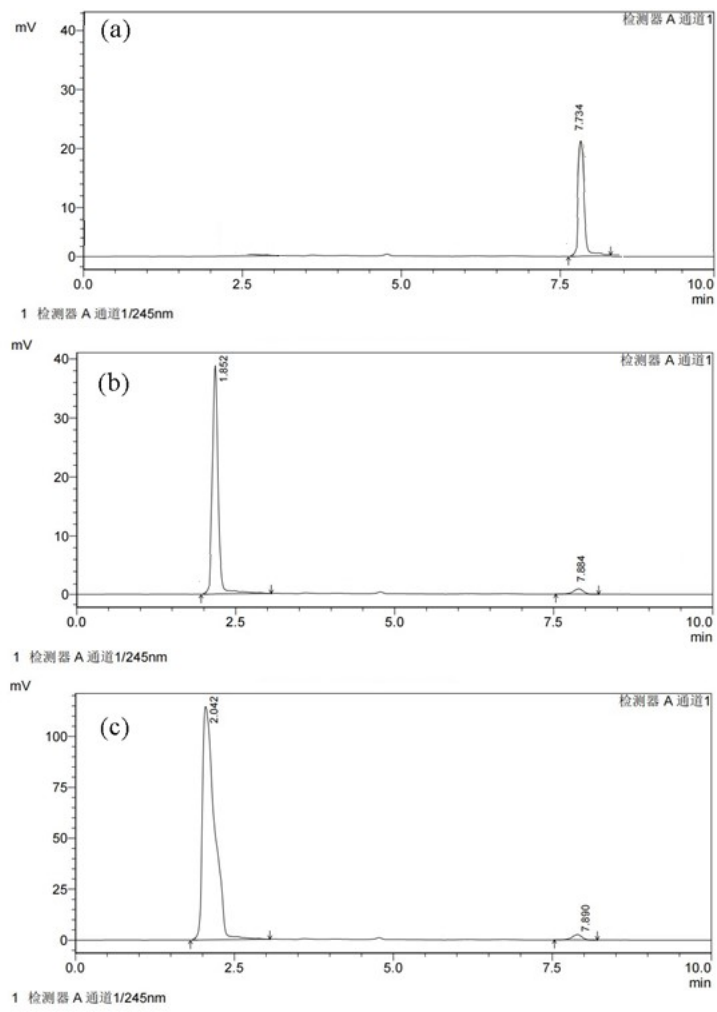

**Fig. S1** Typic chromatograms of (a) NA, (b) NA-DA, and (c) NA-PA.

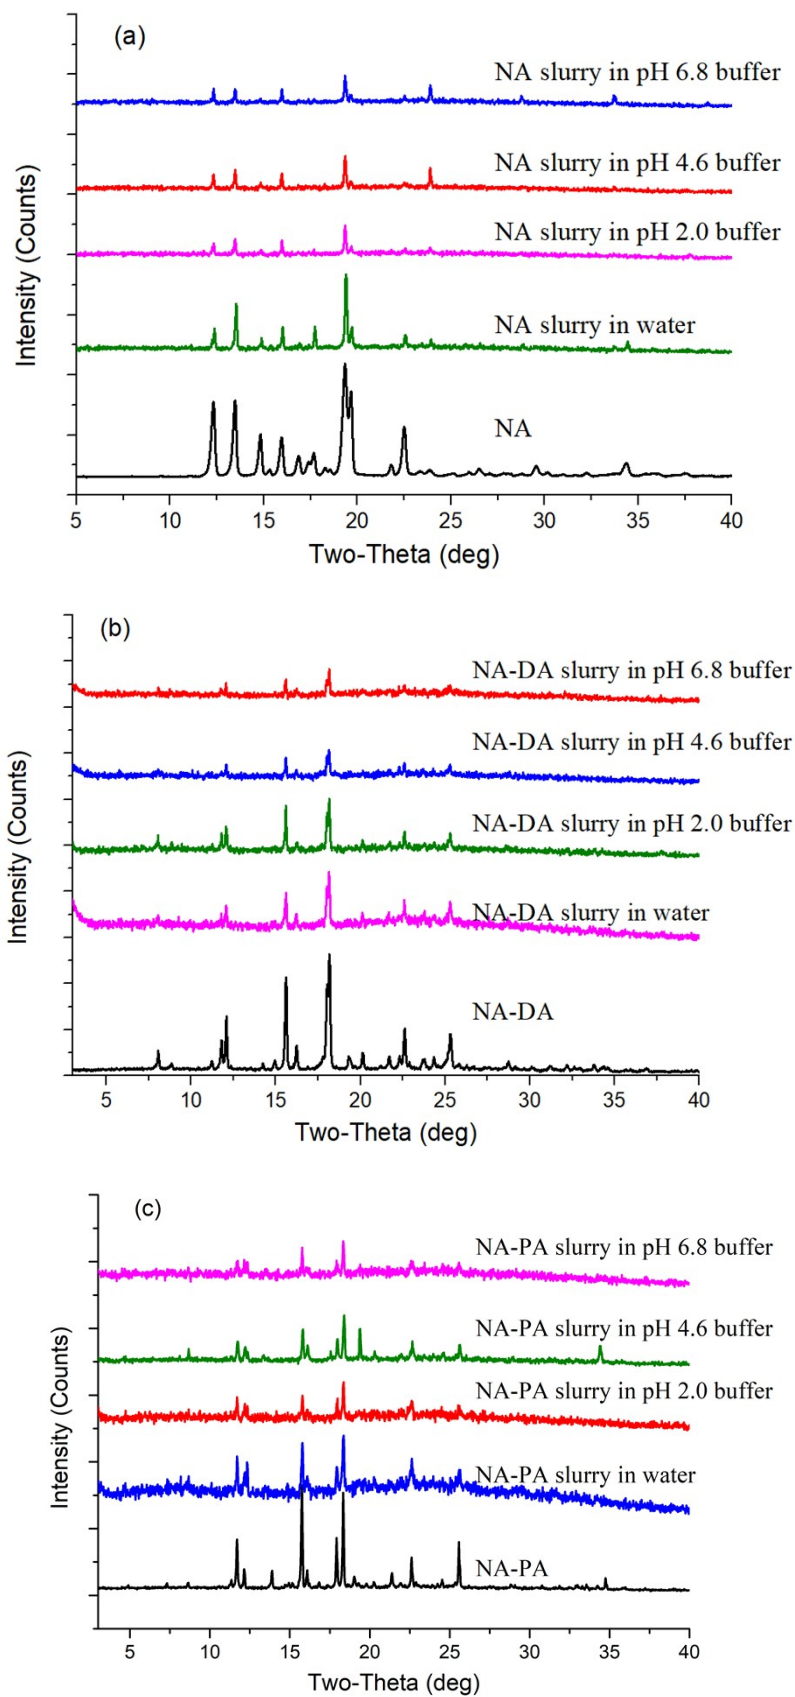

**Fig. S2** Comparison of PXRD patterns before and after dissolution experiments (a) NA, (b) NA-DA, and (c) NA-PA.

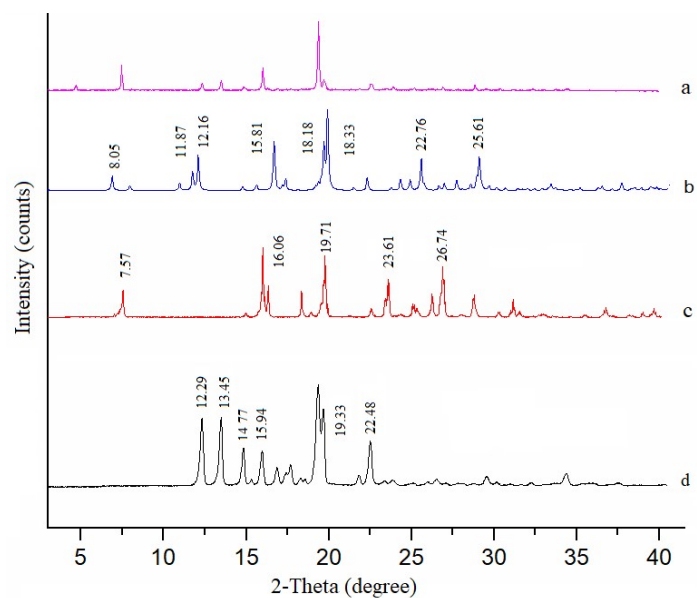

**Fig. S3** PXR D patterns of (a) NA-DA PM, (b) NA-DA, (c) DA and (d) NA.

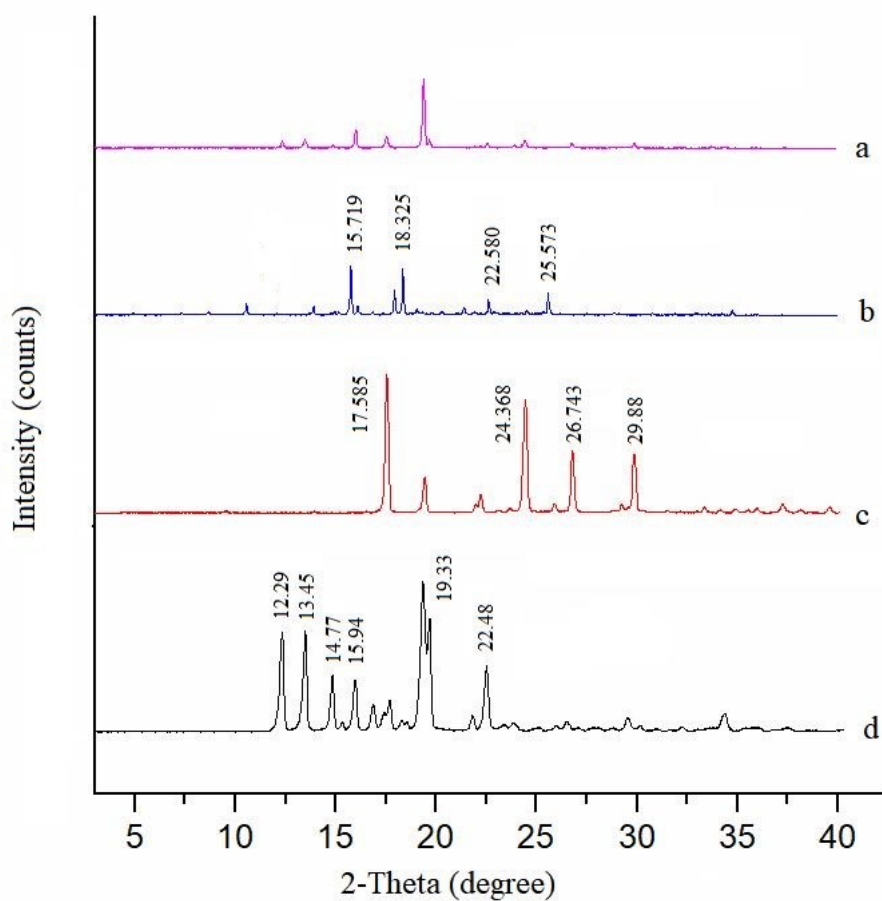

**Fig. S4** PXR D diffractograms of (a) NA-PA PM, (b) NA-PA, (c) PA and (d) NA.

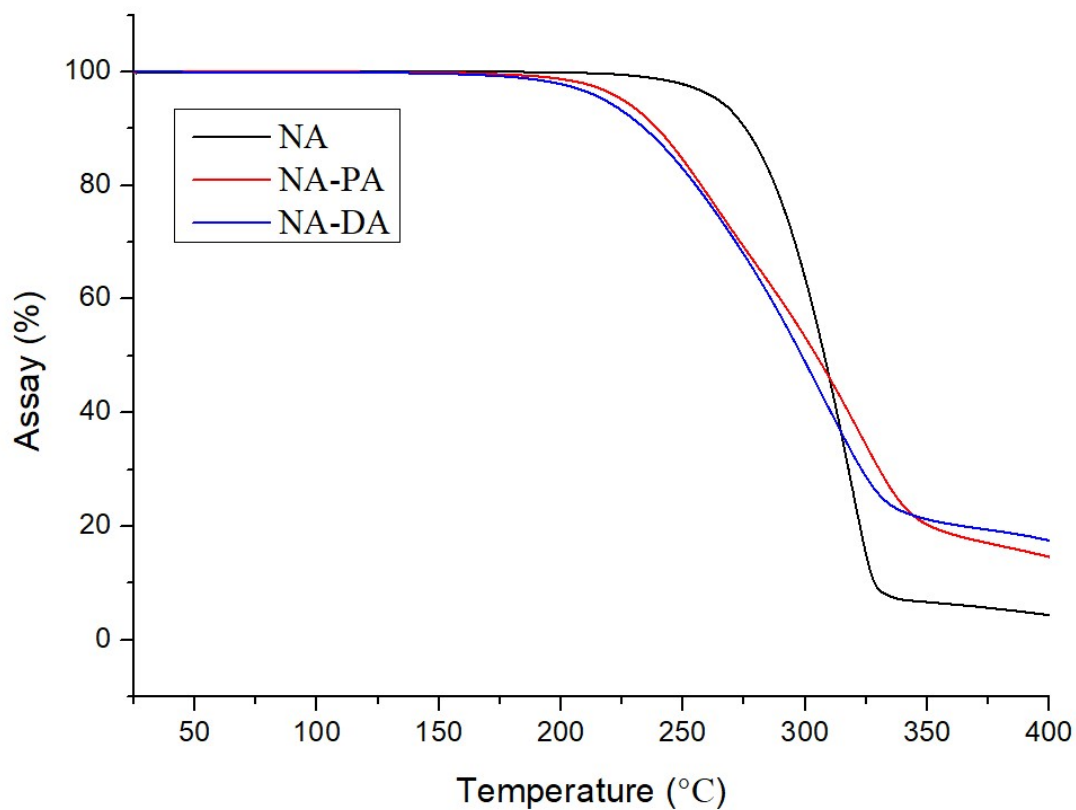

**Fig. S5** Comparison of TGA thermograms of NA, NA-DA, and NA-PA

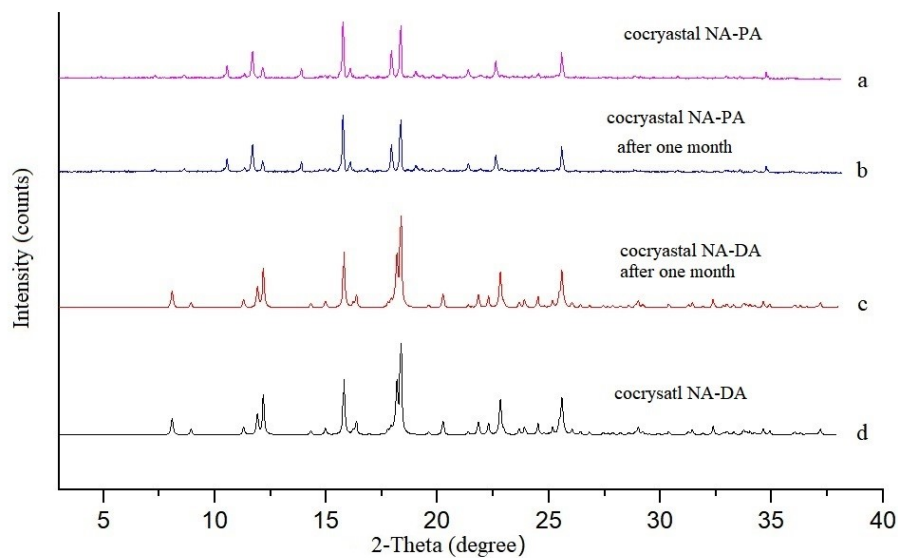

**Fig. S6** PXRD patterns of cocryastal NA-DA and NA-PA at 40 °C /75% RH two months

**Table S1** Hydrogen bonding distances and angles for NA-DA and NA-PA

|              | D-H...A     | H...A (Å) | D...A (Å) | ∠D-H...A (°) | Symmetry code   |
|--------------|-------------|-----------|-----------|--------------|-----------------|
| <b>NA-DA</b> | O7-H7A...O1 | 1.78      | 2.5920(2) | 173          | x, 1/2+y, -1-z  |
|              | O8-H8A...O4 | 1.98      | 2.8013(2) | 171          | 2-x, 1/2+y, 1-z |
|              | O5-H5...O6  | 1.89      | 2.6185(2) | 144          | x, y, z         |
| <b>NA-PA</b> | O5-H5...O1  | 1.85      | 2.6853(3) | 173          | 1+x, y, 1+z     |
|              | O6-H6...O4  | 1.86      | 2.6933(3) | 171          | x, y, -1+z      |

**Table S2** Summary of equilibrium solubility of NA, NA-DA, and NA-PA

| Material | Equilibrium Solubility (ug/mL) |        |        |        |
|----------|--------------------------------|--------|--------|--------|
|          | deionized water                | pH 2.0 | pH 4.6 | pH 6.8 |
| NA       | 2.7                            | 2.1    | 2.3    | 2.6    |
| NA-DA    | 8.0                            | 4.8    | 4.2    | 4.6    |
| NA-PA    | 5.3                            | 4.0    | 4.2    | 4.8    |
